# Supplementary material for: A gelatin/collagen/polycaprolactone scaffold for skin regeneration
Source: PeerJ. 2019 Feb 1;7:e6358. doi: 10.7717/peerj.6358 (PMC6361006; doi:10.7717/peerj.6358)
Supplement: Supplemental Information 1 — Protein release. [file peerj-07-6358-s001.xls]

## Sheet: Sheet1
	* Microplate Manager Bio-Rad Laboratories, Inc. (Model 680)
	* GCHPL (1:8 gelatin/ 25% collagen:PCL biocomposite)
	* GCHPH (1:20 gelatin/ 25% collagen:PCL biocomposite)
	* GCLPL (1:8 gelatin/ 10% collagen:PCL biocomposite)
	* GCLPH (1:20 gelatin/ 10% collagen:PCL biocomposite)
			6 hour		OD(raw)-Blank OD					12 hours			OD(raw)-Blank OD					Day 1			OD(raw)-Blank OD					Day 3			OD(raw)-Blank OD					Day 6			OD(raw)-Blank OD					Day 9			OD(raw)-Blank OD
		Sample	OD(raw)	Blank OD	OD	Conc.(ug/ml)	Mean Conc.(ug/ml)	Standard D	Standard E	Sample	OD	Blank OD	OD	Conc.(ug/ml)	Mean Conc.(ug/ml)	Standard D	Standard E	Sample	OD	Blank OD	OD	Conc.(ug/ml)	Mean Conc.(ug/ml)	Standard D	Standard E	Sample	OD	Blank OD	OD	Conc.(ug/ml)	Mean Conc.(ug/ml)	Standard D	Standard E	Sample	OD	Blank OD	OD	Conc.(ug/ml)	Mean Conc.(ug/ml)	Standard D	Standard E	Sample	OD	Blank OD	OD	Conc.(ug/ml)	Mean Conc.(ug/ml)	Standard D	Standard E
	GCHPL	1	0.27	0.073	0.197	179.091	180.606	8.73548	4.36774	1	0.094	0.062	0.032	29.0909	23.0303	5.55464	2.77732	1	0.07	0.058	0.012	10.9091	11.2121	5.00688	2.50344	1	0.068	0.058	0.01	9.09091	6.36364	2.40523	1.20261	1	0.124	0.112	0.012	10.9091	7.57576	6.57653	3.28826	1	0.097	0.091	0.006	5.45455	2.72727	2.72727	1.36364
		2	0.282	0.073	0.209	190				2	0.086	0.062	0.024	21.8182				2	0.076	0.058	0.018	16.3636				2	0.064	0.058	0.006	5.45455				2	0.125	0.112	0.013	11.8182				2	0.094	0.091	0.003	2.72727
		3	0.263	0.073	0.19	172.727				3	0.082	0.062	0.02	18.1818				3	0.065	0.058	0.007	6.36364				3	0.063	0.058	0.005	4.54545				3	0.105	0.112	0	0				3	0.085	0.091	0	0
	GCHPH	1	0.387	0.073	0.314	285.455	205.758	101.925	50.9625	1	0.111	0.062	0.049	44.5455	52.1212	10.1368	5.0684	1	0.065	0.058	0.007	6.36364	10	3.63636	1.81818	1	0.075	0.058	0.017	15.4545	13.3333	2.28783	1.14391	1	0.119	0.112	0.007	6.36364	3.33333	3.19262	1.59631	1	0.098	0.091	0.007	6.36364	19.0909	27.7384	13.8692
		2	0.338	0.073	0.265	240.909				2	0.132	0.062	0.07	63.6364				2	0.069	0.058	0.011	10				2	0.07	0.058	0.012	10.9091				2	0.104	0.112	0	0				2	0.147	0.091	0.056	50.9091
		3	0.173	0.073	0.1	90.9091				3	0.115	0.062	0.053	48.1818				3	0.073	0.058	0.015	13.6364				3	0.073	0.058	0.015	13.6364				3	0.116	0.112	0.004	3.63636				3	0.09	0.091	0	0
	GCLPL	1	0.249	0.073	0.176	160	153.939	6.38524	3.19262	1	0.107	0.062	0.045	40.9091	35.1515	5.00688	2.50344	1	0.072	0.058	0.014	12.7273	8.48485	3.78485	1.89242	1	0.075	0.058	0.017	15.4545	13.3333	2.92232	1.46116	1	0.102	0.112	0	0	0	0	0	1	0.084	0.091	0	0	0	0	0
		2	0.243	0.073	0.17	154.545				2	0.097	0.062	0.035	31.8182				2	0.064	0.058	0.006	5.45455				2	0.069	0.058	0.011	10				2	0.1	0.112	0	0				2	0.076	0.091	0	0
		3	0.235	0.073	0.162	147.273				3	0.098	0.062	0.036	32.7273				3	0.066	0.058	0.008	7.27273				3	0.074	0.058	0.016	14.5455				3	0.108	0.112	0	0				3	0.081	0.091	0	0
	GCLPH	1	0.218	0.073	0.145	131.818	125.455	11.0221	5.51107	1	0.107	0.062	0.045	40.9091	49.3939	17.9378	8.96888	1	0.073	0.058	0.015	13.6364	8.48485	4.48444	2.24222	1	0.072	0.058	0.014	12.7273	14.2424	6.05303	3.02651	1	0.11	0.112	0	0	0	0	0	1	0.084	0.091	0	0	0	0	0
		2	0.218	0.073	0.145	131.818				2	0.103	0.062	0.041	37.2727				2	0.065	0.058	0.007	6.36364				2	0.068	0.058	0.01	9.09091				2	0.1	0.112	0	0				2	0.082	0.091	0	0
		3	0.197	0.073	0.124	112.727				3	0.139	0.062	0.077	70				3	0.064	0.058	0.006	5.45455				3	0.081	0.058	0.023	20.9091				3	0.102	0.112	0	0				3	0.085	0.091	0	0
	Conc.(ug/ml)			Hours
		6h	12h	D1	D3	D6	D9	D12
	GCHPL	180.61	23.03	11.21	6.36	7.58	2.73	12.42
	GCHPH	205.76	52.12	10	13.33	3.33	19.09	6.36
	GCLPL	153.94	35.15	8.48	13.33	0	0	2.12		`
	GCLPH	125.45	49.39	8.48	14.24	0	0	2.12
	Cumulative Conc.(ug/ml)			Hours
		6h	12h	D1	D3	D6	D9	D12
	GCHPL	180.61	203.64	214.85	221.21	228.79	231.52	243.94
	GCHPH	205.76	257.88	267.88	281.21	284.54	303.63	309.99
	GCLPL	153.94	189.09	197.57	210.9	210.9	210.9	213.02
	GCLPH	125.45	174.84	183.32	197.56	197.56	197.56	199.68
	Cumulative Standard E			Hours
		6h	12h	D1	D3	D6	D9	D12
	GCHPL	4.37	5.59	7.94	8.51	11.79	12.89	17.06
	GCHPH	50.96	51.83	50.16	50.17	50.27	57.94	57.47
	GCLPL	3.19	5.36	7.05	7.87	7.87	7.87	7.13
	GCLPH	5.51	3.53	3.44	6.17	6.17	6.17	6.62
		Residual Wt of biocomposite (ug)
	Sample	1	2	3	Mean	SD	SE	Wt of collagen in biocomposite	collagen ratio
	GCHPL	3000	2600	3000	2866.67	230.94	115.47	318.519	*1/9
	GCHPH	6900	7300	5700	6633.33	832.666	416.333	315.873	*1/21
	GCLPL	1400	1600	1700	1566.67	152.753	76.3763	174.074	*1/9
	GCLPH	4500	5000	5000	4833.33	288.675	144.338	230.159	*1/21
		* Real initial Wt of biocomposite (ug)=Residual biocomposite + cumulative collage release
	sum(Cumulative collagen release)	1	2	3	Mean	SD	SE	Wt of collagen in biocomposite	collagen ratio
GCHPL	243.94	3243.94	2843.94	3243.94	3110.61	230.94	115.47	345.623	*1/9
GCHPH	309.99	7209.99	7609.99	6009.99	6943.32	832.666	416.333	330.634	*1/21
GCLPL	213.02	1613.02	1813.02	1913.02	1779.69	152.753	76.3763	197.743	*1/9
GCLPH	199.68	4699.68	5199.68	5199.68	5033.01	288.675	144.338	239.667	*1/21
Cumulative % release
	6h	12h	D1	D3	D6	D9	D12
GCHPL	52.2564	58.9197	62.1631	64.0033	66.1964	66.9863	70.5798
GCHPH	62.2319	77.9955	81.02	85.0516	86.0588	91.8325	93.7561
GCLPL	77.8485	95.6241	99.9125	106.654	106.654	106.654	107.726
GCLPH	52.3434	72.9511	76.4894	82.4309	82.4309	82.4309	83.3155
Cumulative % Standard E
	6h	12h	D1	D3	D6	D9	D12
GCHPL	1.26438	1.61737	2.2973	2.46222	3.41123	3.7295	4.93601
GCHPH	15.4128	15.6759	15.1708	15.1739	15.2041	17.5239	17.3817
GCLPL	1.61321	2.71059	3.56523	3.97991	3.97991	3.97991	3.60569
GCLPH	2.29902	1.47288	1.43532	2.5744	2.5744	2.5744	2.76216
[truncated: 8 more columns]

## Sheet: Sheet2
																			5.3.1.1
																					*****
																					Cumulative % release			Time (Hours)
																						6	12	24	72	144	216	288
																					GCHPL	52.2564	58.9197	62.1631	64.0033	66.1964	66.9863	70.5798
																					GCHPH	62.2319	77.9955	81.02	85.0516	86.0588	91.8325	93.7561
																					GCLPL	77.8485	95.6241	99.9125	106.654	106.654	106.654	107.726
																					GCLPH	52.3434	72.9511	76.4894	82.4309	82.4309	82.4309	83.3155
																					Cumulative % Standard E			Time (Hours)
																						6h	12h	D1	D3	D6	D9	D12
																					GCHPL	1.26438	1.61737	2.2973	2.46222	3.41123	3.7295	4.93601
																					GCHPH	15.4128	15.6759	15.1708	15.1739	15.2041	17.5239	17.3817
																					GCLPL	1.61321	2.71059	3.56523	3.97991	3.97991	3.97991	3.60569
																					GCLPH	2.29902	1.47288	1.43532	2.5744	2.5744	2.5744	2.76216
