# Supplementary material for: A gelatin/collagen/polycaprolactone scaffold for skin regeneration
Source: PeerJ. 2019 Feb 1;7:e6358. doi: 10.7717/peerj.6358 (PMC6361006; doi:10.7717/peerj.6358)
Supplement: Supplemental Information 6 — Wound closure. [file peerj-07-6358-s006.xlsx]

## Sheet: 工作表1
	** Day 0								** Day 4								** Day 8								** Day 12								** Day 16								** Day 21
	(cm2)								(cm2)								(cm2)								(cm2)								(cm2)								(cm2)
	* Samples	Sample 1	Sample 2	Sample 3	Mean	S.Deviation	S.Error		* Samples	Sample 1	Sample 2	Sample 3	Mean	S.Deviation	S.Error		* Samples	Sample 1	Sample 2	Sample 3	Mean	S.Deviation	S.Error		* Samples	Sample 1	Sample 2	Sample 3	Mean	S.Deviation	S.Error		* Samples	Sample 1	Sample 2	Sample 3	Mean	S.Deviation	S.Error		* Samples	Sample 1	Sample 2	Sample 3	Mean	S.Deviation	S.Error
	GCLPH	1.47	1.41	1.34	1.40667	0.0650641	0.032532		GCLPH	1.45	1.38	1.3	1.37667	0.0750555	0.0375278		GCLPH	0.62	0.56	0.57	0.583333	0.0321455	0.0160728		GCLPH	0.44	0.39	0.41	0.413333	0.0251661	0.0125831		GCLPH	0.22	0.16	0.22	0.2	0.034641	0.0173205		GCLPH	0.18	0.14	0.17	0.163333	0.0208167	0.0104083
	ASC+GCLPH	1.4	1.51	1.49	1.46667	0.0585947	0.0292973		ASC+GCLPH	1.37	1.46	1.44	1.42333	0.0472582	0.0236291		ASC+GCLPH	0.57	0.63	0.59	0.596667	0.0305505	0.0152753		ASC+GCLPH	0.4	0.45	0.37	0.406667	0.0404145	0.0202073		ASC+GCLPH	0.19	0.22	0.21	0.206667	0.0152753	0.00763763		ASC+GCLPH	0.013	0.022	0.025	0.02	0.006245	0.0031225
				Time (DAYS)
		Day0	Day4	Day8	Day12	Day16	Day21
	GCLPH	1.40667	1.37667	0.583333	0.413333	0.2	0.163333
	ASC+GCLPH	1.46667	1.42333	0.596667	0.406667	0.206667	0.02
				Time (Hours)
		0	4	8	12	16	21
	1:8 gelatin/25% collagen:PCL biocomposite	0.032532	0.0375278	0.0160728	0.0125831	0.0173205	0.0104083
	1:20 gelatin/25% collagen:PCL biocomposite	0.0292973	0.0236291	0.0152753	0.0202073	0.00763763	0.0031225
