# Supplementary material for: A gelatin/collagen/polycaprolactone scaffold for skin regeneration
Source: PeerJ. 2019 Feb 1;7:e6358. doi: 10.7717/peerj.6358 (PMC6361006; doi:10.7717/peerj.6358)
Supplement: Table S1 [file peerj-07-6358-s007.xls]

## Sheet: Pore size
	SEM	100 um
		Total length (cm)	measure 1	measure 2	measure 3	measure 4	measure 5	measure 6	pore 1	pore 2	pore 3	pore 4	pore 5	pore 6	mean	SD
	GCLPL	8.8	2	0.9	0.7	1.9	1.2	1.4	22.7273	10.2273	7.95455	21.5909	13.6364	15.9091	15.3409	5.95914
	GCLPH	8.8	2.2	1	0.8	2.4	1.6	1.9	25	11.3636	9.09091	27.2727	18.1818	21.5909	18.75	7.32051
	GCHPL	8.8	1.2	0.6	0.5	1.3	0.8	0.9	13.6364	6.81818	5.68182	14.7727	9.09091	10.2273	10.0379	3.62332
	GCHPH	8.8	1.5	0.7	0.6	1.7	1.1	1.3	17.0455	7.95455	6.81818	19.3182	12.5	14.7727	13.0682	4.96631

## Sheet: Tm
	Peak melting temperature (Tm)
		measure 1	measure 2	measure 3	mean	SD
	GCLPL	60.61	57.61	59.28	59.1667	1.50321
	GCLPH	62.39	62.92	59.16	61.49	2.03517
	GCHPL	58.21	58.55	58.15	58.3033	0.215716
	GCHPH	60.18	59.72	59.61	59.8367	0.302379

## Sheet: Crystallinity
	Crystallinity (%)
		measure 1	measure 2	measure 3	mean	SD
	GCLPL	52.22	53.73	55.82	53.9233	1.80777
	GCLPH	54.32	52.72	57.39	54.81	2.37325
	GCHPL	53.92	55.03	56.26	55.07	1.17051
	GCHPH	57.42	58.23	55.55	57.0667	1.37449
